# Supplementary material for: Osteoarthritis genetic risk acting on the galactosyltransferase gene COLGALT2 has opposing functional effects in articulating joint tissues
Source: PubMed Central journal article supplement (PMC10197248; doi:10.1186/s13075-023-03066-y), 2023-05-19

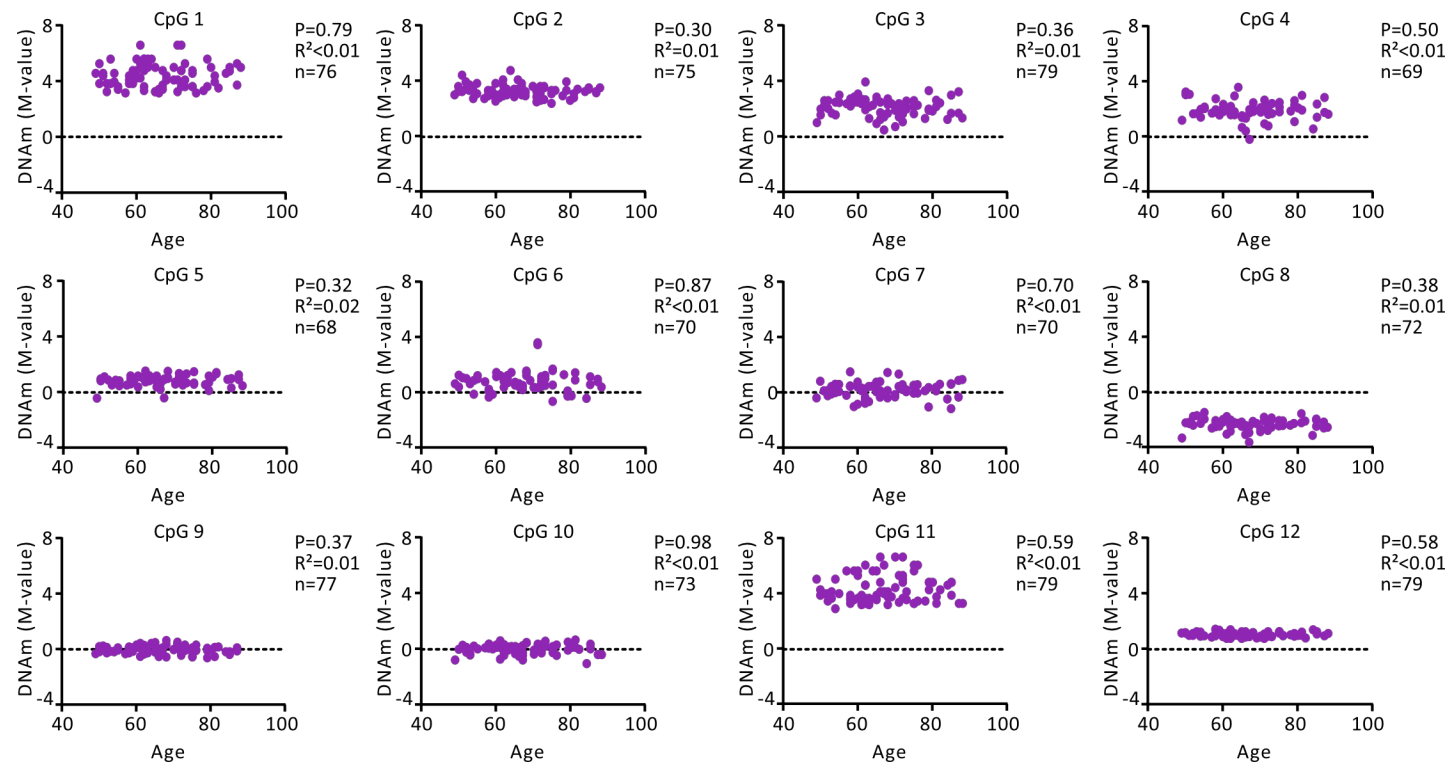

Supplement: 13075_2023_3066_MOESM4_ESM.pdf [file 13075_2023_3066_MOESM4_ESM.pdf]
