# Supplementary material for: Osteoarthritis genetic risk acting on the galactosyltransferase gene COLGALT2 has opposing functional effects in articulating joint tissues
Source: PubMed Central journal article supplement (PMC10197248; doi:10.1186/s13075-023-03066-y), 2023-05-19
Supplement: 13075_2023_3066_MOESM10_ESM.pdf [file 13075_2023_3066_MOESM10_ESM.pdf]

A

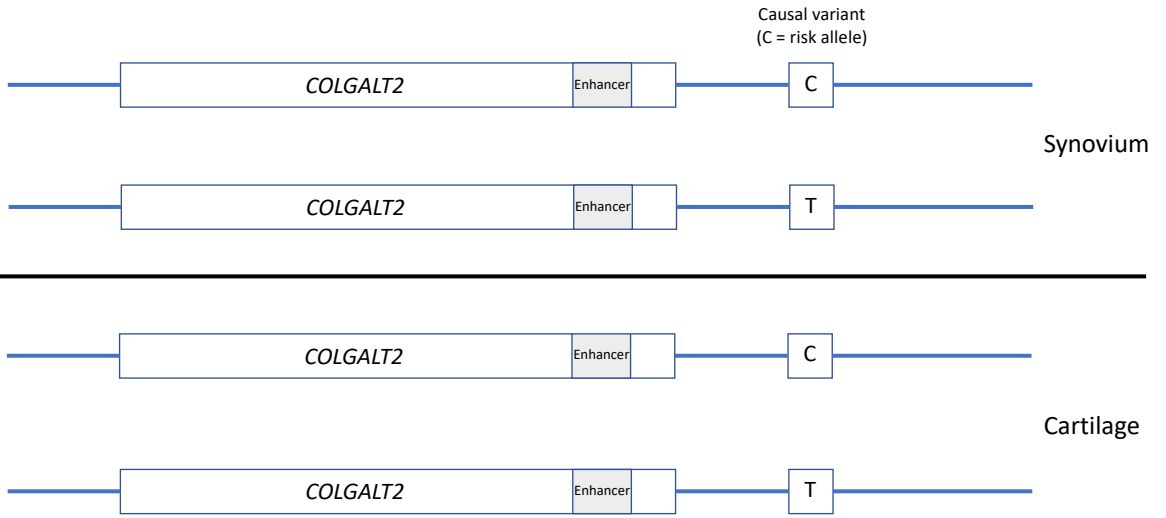

B

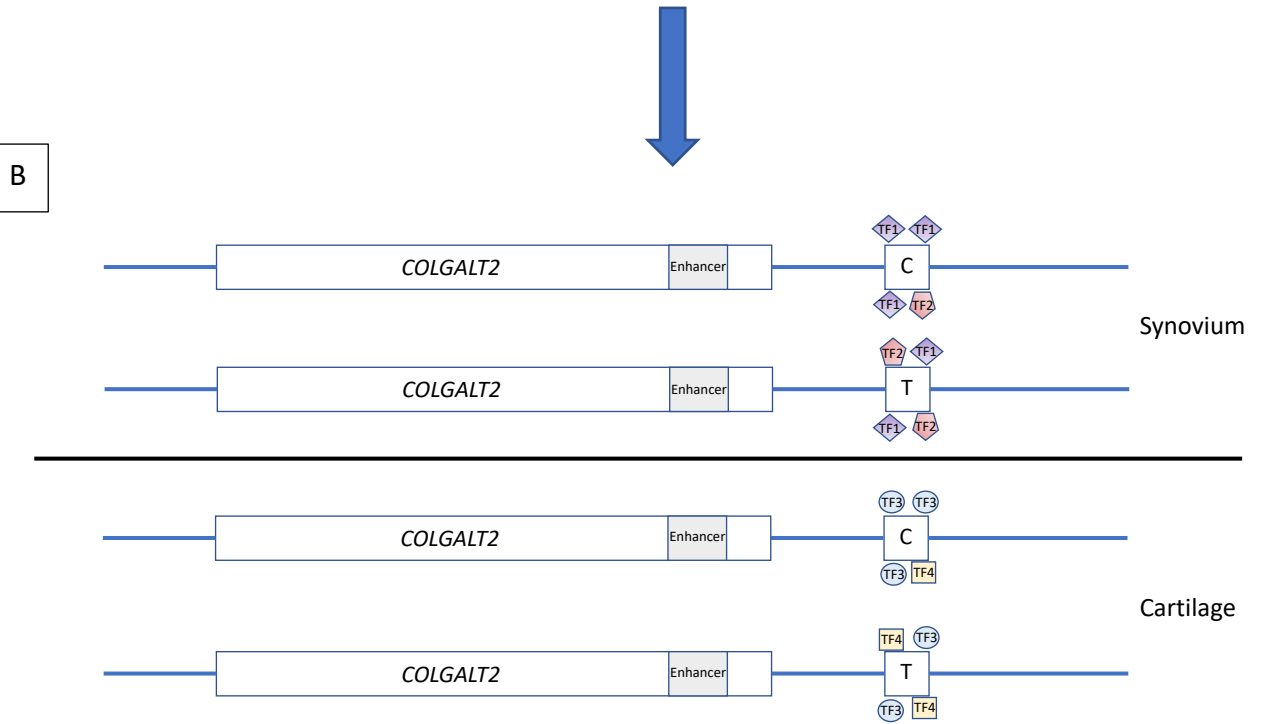

TF1 TF2 = synovium transcription factors  
TF3 TF4 = cartilage transcription factors

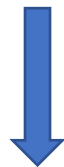

C

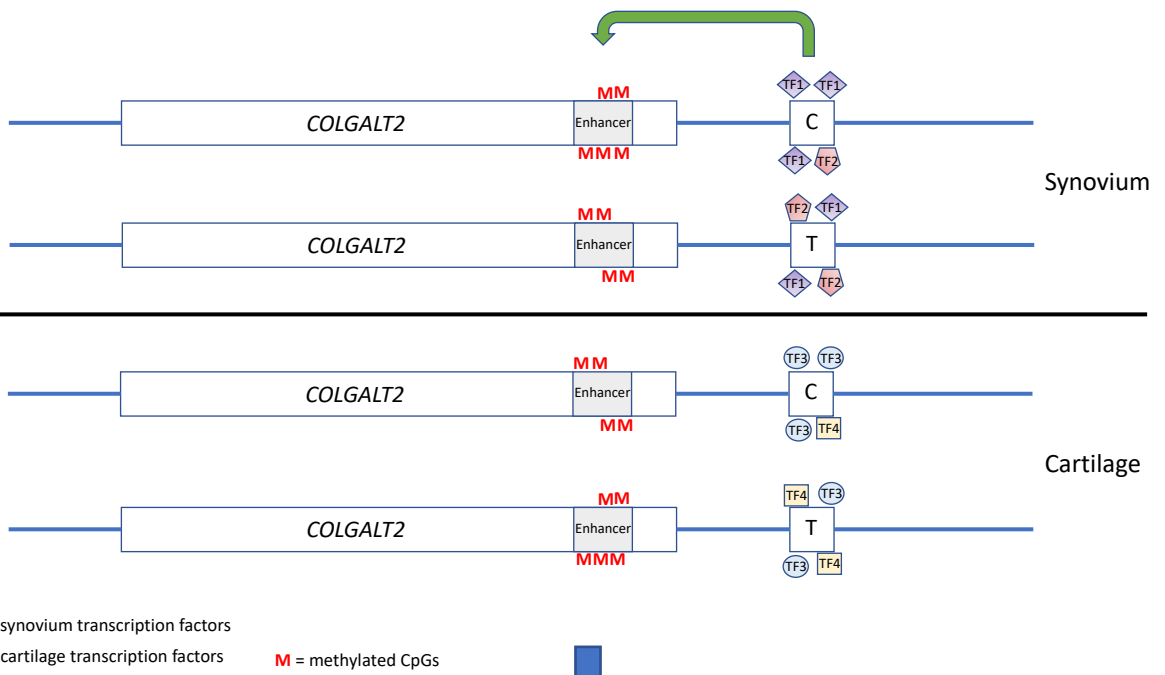

D

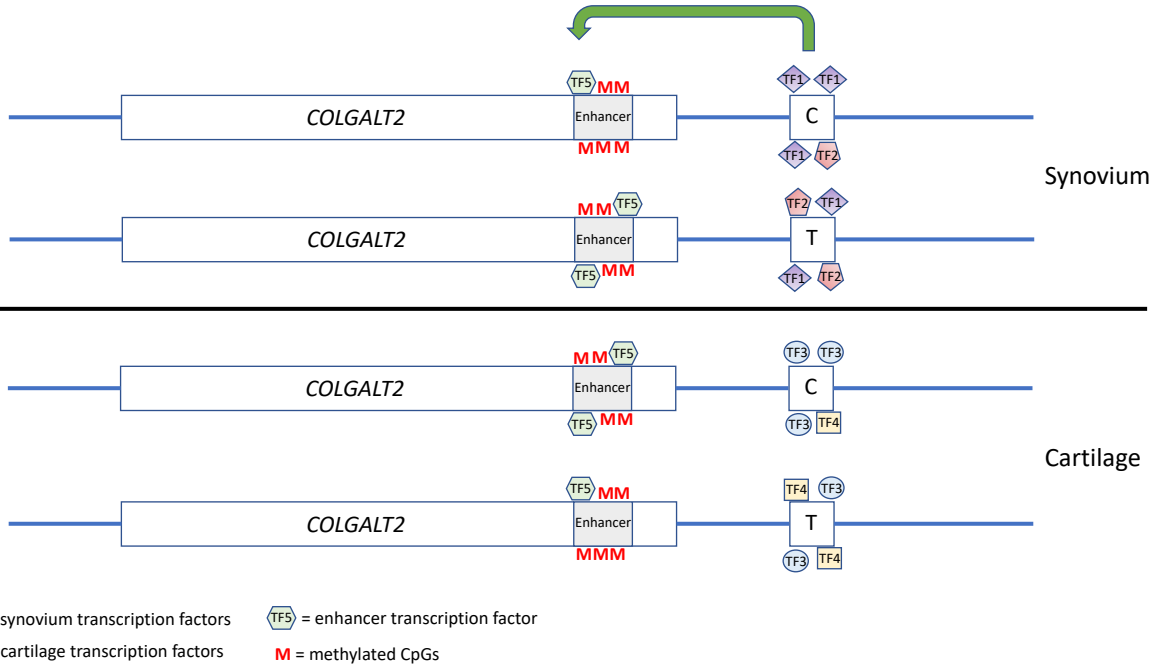

E

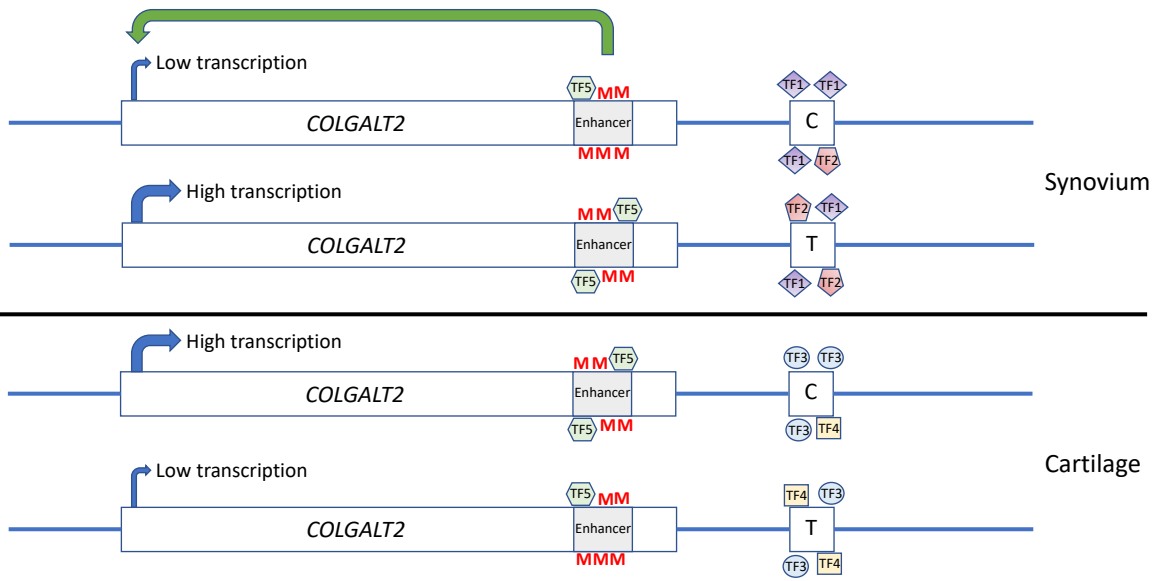

TF1 TF2 = synovium transcription factors    TF5 = enhancer transcription factor  
TF3 TF4 = cartilage transcription factors    M = methylated CpGs
